# Supplementary material
Source: PubMed Central journal article supplement (PMC11200175)
Supplement: NIHMS1998430-supplement-1.pdf [file NIHMS1998430-supplement-1.pdf]

## Online Supplement

**Table S1. Search Strategy for identification of studies reporting the validity of ICD-10 codes for identification of patients with pulmonary embolism**

((PTE[TI] OR "Pulmonary Embolism"[MAJR] OR "Pulmonary Embolism"[TI] OR "Pulmonary embolus"[TI] OR "Pulmonary Embolism/etiology"[MAJR] OR "Pulmonary Embolism/prevention and control"[MeSH Terms] OR "Pulmonary Embolism/diagnosis"[MAJR] OR (pulmonar\*[TI] AND (thrombos\*[TI] OR thrombot\*[TI] OR thromboem\*[TI] OR emboli\*[TI] OR "Thrombosis"[Mesh] OR "Embolism"[Mesh]))) OR ((deep\*[TI] AND (vein\*[TI] OR venous\*[TI] OR "Veins"[Mesh]) AND (thrombos\*[TI] OR thrombot\*[TI] OR thromboem\*[TI] OR emboli\*[TI] OR "Thrombosis"[Mesh])) OR ("deep vein thrombosis"[TI] OR "deep venous thrombosis"[TI] OR "DVT\*" [TI])) OR (VTE[TI] OR "Venous Thromboembolism"[TI] OR "Venous Thromboembolism"[MAJR] OR "Venous Thrombosis"[MAJR] OR "Venous Thrombosis"[TI] OR ((vein\*[TI] OR venous\*[TI] OR "Veins"[Mesh]) AND (thrombos\*[TI] OR thrombot\*[TI] OR thromboem\*[TI] OR emboli\*[TI] OR "Thrombosis"[Mesh]))) AND ("International Classification of Diseases"[Mesh] AND 10) OR "ICD-10" OR "ICD 10")

| Table S2. Examples of CPT/ICD-10 codes for diagnostic or therapeutic procedures* |                     |                                                                                                                                                        |
|----------------------------------------------------------------------------------|---------------------|--------------------------------------------------------------------------------------------------------------------------------------------------------|
|                                                                                  | Codes               | Definition                                                                                                                                             |
| <b>Diagnostic Procedures</b>                                                     |                     |                                                                                                                                                        |
| CTPA                                                                             | B32S                | Computerized Tomography (CT Scan) of Right Pulmonary Artery using High Osmolar Contrast                                                                |
|                                                                                  | B32S0ZZ             | Computerized Tomography (CT Scan) of Right Pulmonary Artery using High Osmolar Contrast                                                                |
|                                                                                  | B32S1ZZ             | Computerized Tomography (CT Scan) of Right Pulmonary Artery using Low Osmolar Contrast                                                                 |
|                                                                                  | B32SYZZ             | Computerized Tomography (CT Scan) of Right Pulmonary Artery using Other Contrast                                                                       |
|                                                                                  | B32SZZZ             | Computerized Tomography (CT Scan) of Right Pulmonary Artery                                                                                            |
|                                                                                  | B32T                | Computerized Tomography (CT Scan) of Left Pulmonary Artery using High Osmolar Contrast                                                                 |
|                                                                                  | B32T0ZZ             | Computerized Tomography (CT Scan) of Left Pulmonary Artery using High Osmolar Contrast                                                                 |
|                                                                                  | B32T1ZZ             | Computerized Tomography (CT Scan) of Left Pulmonary Artery using Low Osmolar Contrast                                                                  |
|                                                                                  | B32TYZZ             | Computerized Tomography (CT Scan) of Left Pulmonary Artery using Other Contrast                                                                        |
|                                                                                  | B32TZZZ             | Computerized Tomography (CT Scan) of Left Pulmonary Artery                                                                                             |
|                                                                                  | 71275               | Computed Tomographic Angiography, Chest (Noncoronary), With Contrast Material(S), Including Noncontrast Images, If Performed, And Image Postprocessing |
| CT                                                                               | 71260               | Computed Tomography (CT) scan chest with contrast material                                                                                             |
|                                                                                  | 74160               | Computed Tomography (CT) scan Abdomen with contrast material                                                                                           |
|                                                                                  | 70498               | Computed tomographic angiography, neck, with contrast material(s), including noncontrast images, if performed, and image postprocessing                |
| Ventilation/<br>perfusion imaging                                                | 78580 <sup>54</sup> | Pulmonary perfusion imaging                                                                                                                            |
|                                                                                  | 78582 <sup>54</sup> | Pulmonary ventilation (eg, aerosol or gas)                                                                                                             |

|                               |                          |                                                                                                                                                            |
|-------------------------------|--------------------------|------------------------------------------------------------------------------------------------------------------------------------------------------------|
|                               |                          | and<br>perfusion imaging                                                                                                                                   |
|                               | 78584 <sup>54</sup>      | Pulmonary perfusion with vent single breath<br>(Deleted code effective Jan 1, 2012)                                                                        |
|                               | 78585 <sup>54</sup>      | Pulmonary perfusion w/ washout, w or w/o single breath<br>(Deleted code effective Jan 1, 2012)                                                             |
|                               | 78588 <sup>55</sup>      | Pulmonary perfusion imaging, particulate, with ventilation; rebreathing and washout, with or without single breath<br>(Deleted code effective Jan 1, 2012) |
|                               | 78598                    | Quantitative differential pulmonary perfusion and ventilation (eg, aerosol or gas), including imaging when performed                                       |
| Pulmonary angiography         | 75741 <sup>54</sup>      | Angiography, pulmonary, unilateral, selective, radiological supervision and interpretation                                                                 |
|                               | 75743 <sup>54</sup>      | Angiography, pulmonary, bilateral, selective, radiological supervision, and interpretation                                                                 |
|                               | 75746 <sup>54</sup>      | Angiography, pulmonary by nonselective catheter or venous injection, radiological supervision and interpretation                                           |
|                               | 75746 <sup>54</sup>      | Angiography, pulmonary by nonselective catheter or venous injection, radiological supervision and interpretation                                           |
| <b>Therapeutic procedures</b> |                          |                                                                                                                                                            |
| Systemic thrombolysis         | 3E03317 <sup>56</sup>    | Introduction of Other Thrombolytic into Peripheral Vein, Percutaneous Approach                                                                             |
|                               | 3E04017 <sup>56</sup>    | Introduction of Other Thrombolytic into Central Vein, Open Approach                                                                                        |
|                               | 3E04317 <sup>56</sup>    | Introduction of Other Thrombolytic into Central Vein, Percutaneous Approach                                                                                |
|                               | Z92.82 <sup>57, 58</sup> | Status post administration of tPA (rtPA) in a different facility within the last 24 hours prior to admission to current facility                           |
| IVC filter                    | 06H03DZ                  | Insertion of Intraluminal Device into Inferior Vena Cava, Percutaneous Approach                                                                            |
|                               | 06H00DZ                  | Insertion of Intraluminal Device into Inferior Vena Cava, Open Approach                                                                                    |
|                               | 06V03DZ                  | Restriction of Inferior Vena Cava with Intraluminal Device, Percutaneous Approach                                                                          |
|                               | 06V00DZ                  | Restriction of Inferior Vena Cava with                                                                                                                     |

|                                            |                       |                                                                                                                                                                                                          |
|--------------------------------------------|-----------------------|----------------------------------------------------------------------------------------------------------------------------------------------------------------------------------------------------------|
|                                            |                       | Intraluminal Device, Open Approach                                                                                                                                                                       |
|                                            | 37191 <sup>59</sup>   | Other Transcatheter Procedures (IVC filter placement)                                                                                                                                                    |
| Catheter-directed therapies                | 3E06017 <sup>56</sup> | Introduction of Other Thrombolytic into Central Artery, Open Approach                                                                                                                                    |
|                                            | 3E06317 <sup>56</sup> | Introduction of Other Thrombolytic into Central Artery, Percutaneous Approach                                                                                                                            |
|                                            | 3E03017               | Introduction of other thrombolytic into peripheral vein, open approach                                                                                                                                   |
|                                            | 3E03317               | Introduction of other thrombolytic into peripheral vein, percutaneous approach                                                                                                                           |
|                                            | 37201 <sup>60</sup>   | Transcatheter Arterial Infusion for Thrombolysis<br>(Deleted code effective Jan 1, 2013)                                                                                                                 |
|                                            | 37211 <sup>60</sup>   | Transcatheter therapy, arterial infusion for thrombolysis other than coronary                                                                                                                            |
| Surgical embolectomy                       | 02CQ0ZZ               | Extirpation of Matter from Right Pulmonary Artery, Open Approach                                                                                                                                         |
|                                            | 02CR0ZZ               | Extirpation of Matter from Left Pulmonary Artery, Open Approach                                                                                                                                          |
|                                            | 33910 <sup>61</sup>   | Pulmonary artery embolectomy                                                                                                                                                                             |
|                                            | 33915 <sup>62</sup>   | Pulmonary artery embolectomy                                                                                                                                                                             |
|                                            | 33916 <sup>61</sup>   | Surgical Procedures on the Pulmonary Artery                                                                                                                                                              |
| Percutaneous embolectomy                   | 02CP3ZZ               | Extirpation of Matter from Pulmonary Trunk, Percutaneous Approach                                                                                                                                        |
|                                            | 02CQ3ZZ               | Extirpation of Matter from Right Pulmonary Artery, Percutaneous Approach                                                                                                                                 |
|                                            | 02CR3ZZ               | Extirpation of Matter from Left Pulmonary Artery, Percutaneous Approach                                                                                                                                  |
|                                            | 37184 <sup>60</sup>   | Primary percutaneous transluminal mechanical thrombectomy, noncoronary, arterial or arterial bypass graft, including fluoroscopic guidance and intraprocedural pharmacological thrombolytic injection(s) |
|                                            | 37184 <sup>60</sup>   | Primary percutaneous transluminal mechanical thrombectomy, noncoronary, arterial or arterial bypass graft, including fluoroscopic guidance and intraprocedural pharmacological thrombolytic injection(s) |
| Extracorporeal Membrane Oxygenation (ECMO) | 5A1522F               | Extracorporeal Oxygenation, Membrane, Central                                                                                                                                                            |
|                                            | 5A1522G               | Extracorporeal Oxygenation, Membrane,                                                                                                                                                                    |

|  |         |                                                                                                                                                                                                                                                     |
|--|---------|-----------------------------------------------------------------------------------------------------------------------------------------------------------------------------------------------------------------------------------------------------|
|  |         | Peripheral VenO-arterial                                                                                                                                                                                                                            |
|  | 5A1522H | Extracorporeal Oxygenation, Membrane, Peripheral VenO-venous                                                                                                                                                                                        |
|  | 33946   | Extracorporeal membrane oxygenation (ECMO)/ extracorporeal life support (ECLS) provided by physician; initiation, veno-venous                                                                                                                       |
|  | 33947   | Extracorporeal membrane oxygenation (ECMO)/ extracorporeal life support (ECLS) provided by physician; initiation, veno-arterial.                                                                                                                    |
|  | 33948   | Extracorporeal membrane oxygenation (ECMO)/ extracorporeal life support (ECLS) provided by physician; daily management, each day, veno-venous.                                                                                                      |
|  | 33952   | Extracorporeal membrane oxygenation (ECMO)/ extracorporeal life support (ECLS) provided by physician; insertion of peripheral (arterial and/or venous) cannula(e), percutaneous, 6 years and older (includes fluoroscopic guidance, when performed) |
|  | 33954   | Extracorporeal membrane oxygenation (ECMO)/ extracorporeal life support (ECLS) provided by physician; insertion of peripheral (arterial and/or venous) cannula(e), open, 6 years and older.                                                         |
